# Supplementary material
Source: HighWire-hosted journal article supplement (https://bmjopenquality.bmj.com/content/6/2/e000130)
Supplement: inline-supplementary-material-1 [file inline-supplementary-material-1.docx]

**Appendix**

A. Sample CBES Rounding Patient List

**NICU Care Coordination Team Rounding Notes**

| **Updates: Discharges / Deaths / Readmissions-** | | | | | |
| --- | --- | --- | --- | --- | --- |
| **MR** | **Name** | **GA** | **PMA** | **Major Dx/Issues** | **Notes** |
|  |  |  |  |  |  |
|  |  |  |  |  |  |
|  |  |  |  |  |  |
|  |  |  |  |  |  |
|  |  |  |  |  |  |
|  |  |  |  |  |  |
|  |  |  |  |  |  |
|  |  |  |  |  |  |

- ***New CCBES Patient Discussion**
- **Active: Discuss**
- *Nested: Monitor*
- Active Issues Involving: (E) Ethical, (C) Cardiac, (S) General Pediatric Surgery
